# Supplementary material for: Development of TEM-1 β-lactamase based protein translocation assay for identification of Anaplasma phagocytophilum type IV secretion system effector proteins
Source: PubMed Central journal article supplement (PMC6414681; doi:10.1038/s41598-019-40682-8), 2019-03-12

**Development of TEM-1  $\beta$ -lactamase based protein translocation assay for identification of**

***Anaplasma phagocytophilum* type IV secretion system effector proteins**

Jiafeng Zhu, Meiling He, Wenting Xu, Yuanyuan Li, Rui Huang, Shuyan Wu, Hua Niu\*

Department of Microbiology, College of Medicine, Soochow University, Suzhou, Jiangsu  
Province, 215123, China.

\*Corresponding Author:

Hua Niu, PhD

Department of Microbiology, College of Medicine, Soochow University,  
199 Ren Ai Road,  
Suzhou, Jiangsu Province, 215123, China.

E-mail: hniu@suda.edu.cn, or niu\_hua@126.com

Tel: +86-512-65880132

## Supplementary Information

**Table S1. Primers used for PCR amplification**

| Primer ID          | Sequence (5'-3')                                 | Note                        | Purpose                                                                                                  |
|--------------------|--------------------------------------------------|-----------------------------|----------------------------------------------------------------------------------------------------------|
| SM-F               | CTT <u>CGGCCCGCCT</u> GCCTATCCACG<br>GAATCT      | NotI site is<br>underlined  |                                                                                                          |
| SM-R               | TCAC <u>CATATG</u> TATTGCGGACTACC<br>TTGGTGATC   | NdeI site is<br>underlined  | Replacement of<br>ampicillin resistance                                                                  |
| pMal-F             | TCAC <u>CATATG</u> CTGTCAGACCAAGTT<br>TACTCAT    | NdeI site is<br>underlined  | gene <i>bla</i> with <i>Sm<sup>R</sup></i> in<br>plasmid pTraG-VirD4                                     |
| pMal-R             | CTT <u>CGGCCCGCAAC</u> CGGACCGAAA<br>GAGTTT      | NotI site is<br>underlined  |                                                                                                          |
| VirD4-F            | TCC <u>GTCGACC</u> GACATGTTCTTATT<br>GATTGGC     | SalI site is<br>underlined  | Construction of pVirD4                                                                                   |
| VirD4-R            | TCC <u>GTCGACC</u> CATAATCTATGGTCC<br>TTGTTGG    | SalI site is<br>underlined  |                                                                                                          |
| TEM-1-F            | TATGCGACTCCTGCATTAGGCATA<br>ACG                  |                             | Cloning of TEM-1<br>$\beta$ -lactamase gene into<br>plasmid pACYCDuet-1<br>to generate plasmid<br>pTEM-1 |
| TEM-1-R            | TGCTTCTCAAATGCCTGAGGAGTT<br>TGTAGAAAC            |                             |                                                                                                          |
| pACYCDuet-F        | CCTCAGGCATTGAGAAGCACA                            |                             |                                                                                                          |
| pACYCDuet-R        | CCTAATGCAGGAGTCGCATAAGG                          |                             |                                                                                                          |
| TEM-1-Ats-1-F      | GGCGGTGGAGGCAGCCATATGCT<br>AATAAGAAGAATTCTGAC    |                             | Construction of plasmid<br>pTEM-1-Ats-1                                                                  |
| TEM-1-Ats-1-R      | GCGGCCGCCCATGGACATATGTTA<br>CCTCGTACCTTTACCAT    |                             |                                                                                                          |
| TEM-1-APH0215-F    | GGCGGTGGAGGCAGCCATATGGT<br>CGATAACACCACGAT       |                             | Construction of plasmid<br>pTEM-1-APH0215                                                                |
| TEM-1-APH0215-R    | GCGGCCGCCCATGGACATATGTTA<br>CGTTCTCGATCGGCC      |                             |                                                                                                          |
| TEM-1-APH0756-F    | GGCGGTGGAGGCAGCCATATGCG<br>TCCTGATGGGCAAC        |                             | Construction of plasmid<br>pTEM-1-APH0756                                                                |
| TEM-1-APH0756-R    | GCGGCCGCCCATGGACATATGTTA<br>TCGCGAGACACCACTTC    |                             |                                                                                                          |
| VirD4-Expression-F | ATCC <u>GAATTC</u> AAGCTTGAAAATA<br>CGACCTCAC    | EcoRI site is<br>underlined | Expression of truncated<br>recombinant VirD4<br>protein                                                  |
| VirD4-Expression-R | CTT <u>CGGCCCGCCT</u> TTAGTCTTCCG<br>TTACTGCTATC | NotI site is<br>underlined  |                                                                                                          |
| 215-Delta-C-R      | TAG <u>GATCC</u> TTAATCGCAGTGTAT<br>GTCATAAAAAGT | BamHI site is<br>underlined | Construction of plasmid<br>pTEM-1-APH0215 $\Delta$ C                                                     |
| 215-Delta-C-F      | ATC <u>GATCC</u> GAATCCCTGCA                     | BamHI site is<br>underlined |                                                                                                          |

---

|               |                                           |                             |                                         |
|---------------|-------------------------------------------|-----------------------------|-----------------------------------------|
| APH0215-GFP-F | GCACTCGAGGCCACCATGGTCGA<br>TAACACCACGATAC | XhoI site is<br>underlined  | Construction of plasmid<br>pAPH0215-GFP |
| APH0215-GFP-R | GGTGGATCCCGCGTTCTCGATCGG<br>CCAATAG       | BamHI site is<br>underlined |                                         |

---

**Supplemental Fig. S1**

Full-length blots for Figure 2B and 2C.

# Supplemental Fig. S1

Zhu et al.

Relative to Fig. 2B

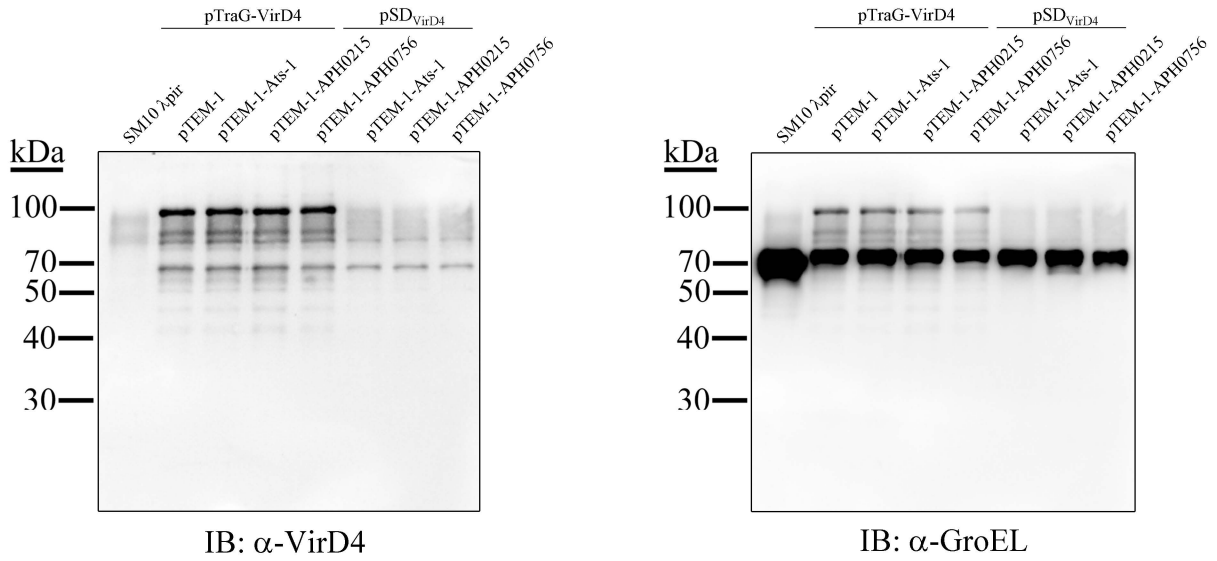

Relative to Fig. 2C

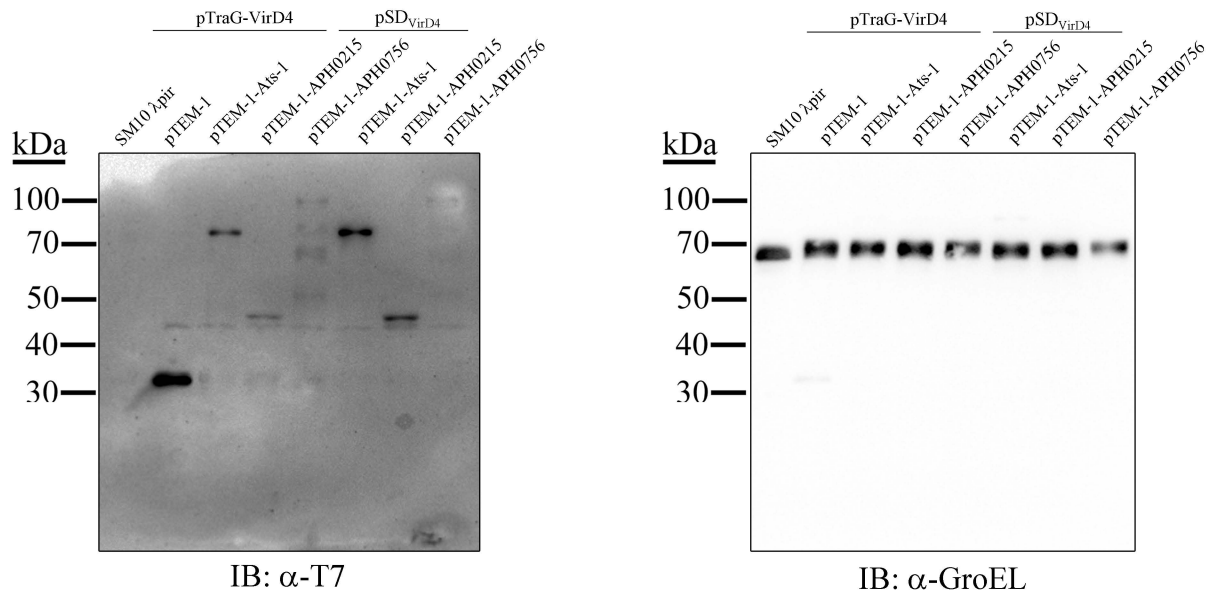

**Supplemental Fig. S2**

Full-length blots for Figure 3A and 3B.

Supplemental Fig. S2

Zhu et al.

Relative to Fig. 3A

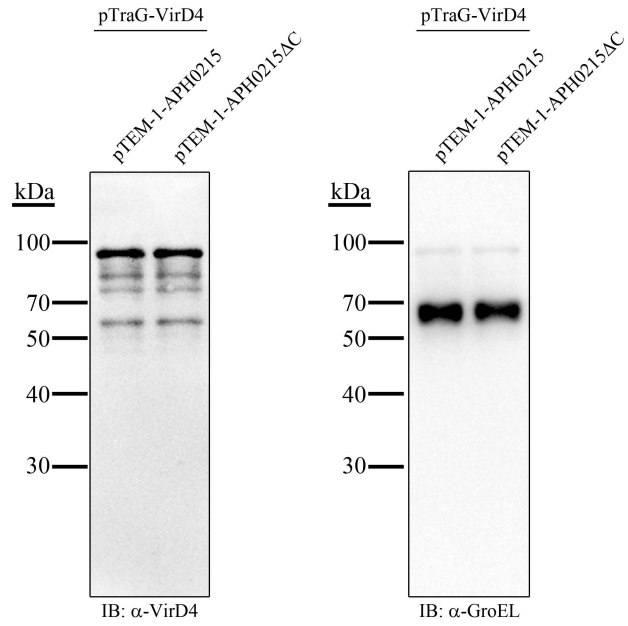

Relative to Fig. 3B

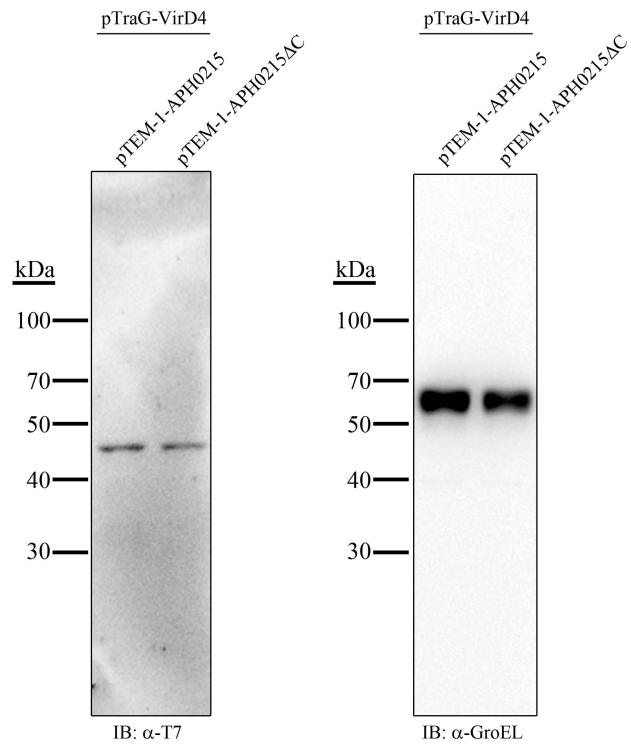

**Supplemental Fig. S3**

Full-length blots for Figure 4B and 4C.



**Supplemental Fig. S3**

Zhu et al.

Relative to Fig. 4B

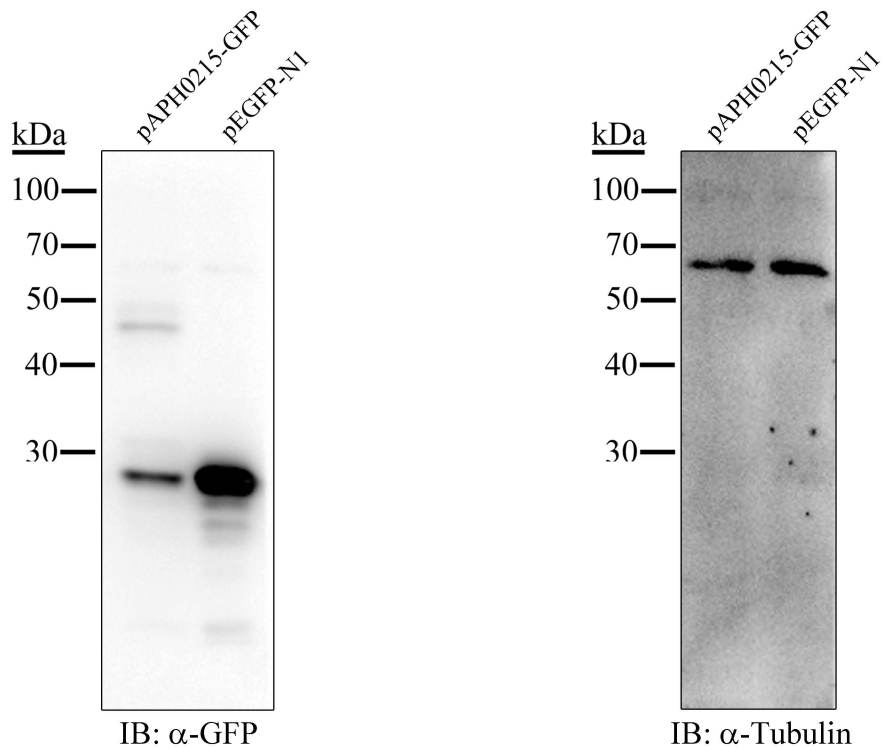

Relative to Fig. 4C

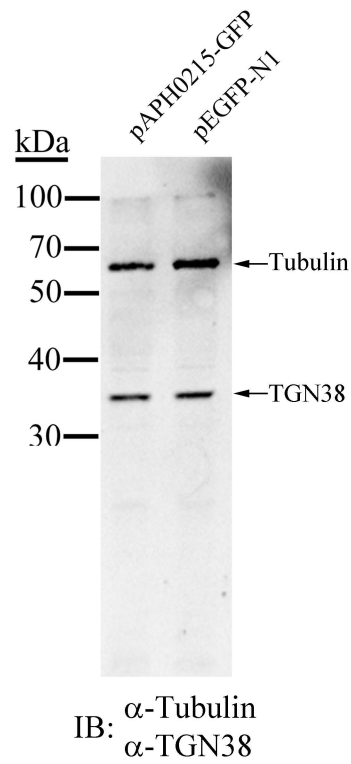

Supplement: 41598_2019_40682_MOESM1_ESM.pdf [file 41598_2019_40682_MOESM1_ESM.pdf]
